# Supplementary material for: NSAIDs as a Drug Repurposing Strategy for Biofilm Control
Source: MDPI journal article supplement (doi:10.3390/antibiotics9090591), 2020-09-10
Supplement: s1 [file s1]

## Supplementary Tables

1. **Table S1.** Log CFU/mL reduction values for NSAIDs at 1/2×MIC, MIC and a concentration above MIC, after 6h
2. **Table S2.** Percentage of biomass reduction and cell inactivation and log CFU/cm<sup>2</sup> reduction of *E. coli* and *S. aureus* biofilms, grown in the presence of the selected NSAIDs at different concentrations (MIC, 5×MIC and 10×MIC). Mean values ± Standard deviation are illustrated
3. **Table S3.** Percentage of biomass reduction and cell inactivation and log CFU/cm<sup>2</sup> reduction of *E. coli* and *S. aureus* biofilms, grown in the presence of KAN and TET at MIC. Mean values ± Standard deviation are illustrated
4. **Table S4.** Percentage of biomass reduction and cell inactivation and log CFU/cm<sup>2</sup> reduction of *E. coli* and *S. aureus* biofilms, grown in the presence of the selected NSAIDs at different concentrations and antibiotics at MIC. Mean values ± Standard deviation are illustrated
5. **Table S5.** Classification of the efficacy of the selected NSAIDs (at MIC, 5×MIC and 10×MIC) and KAN and TET (at MIC), in the control of *E. coli* and *S. aureus* biofilms, in terms of biomass reduction and biofilm inactivation

**Table S1.** Log CFU/mL reduction values for NSAIDs at 1/2×MIC, MIC and a concentration above MIC, after 6h.

| <i>E. coli</i> |           |               | <i>S. aureus</i> |           |               |
|----------------|-----------|---------------|------------------|-----------|---------------|
| NSAID          | C (µg/mL) | log reduction | NSAID            | C (µg/mL) | log reduction |
| PXC            | 400       | 1.20          | DCF              | 1000      | 2.50          |
|                | 800       | 1.27          |                  | 2000      | 3.86          |
|                | 1500      | 1.34          |                  | 2500      | 5.68          |
| ASA            | 875       | 0.19          | ASA              | 1000      | 0.05          |
|                | 1750      | 0.83          |                  | 2000      | 0.92          |
|                | 2500      | 0.90          |                  | 2500      | 1.06          |

**Table S2.** Percentage of biomass reduction and cell inactivation and log CFU/cm<sup>2</sup> reduction of *E. coli* and *S. aureus* biofilms, grown in the presence of the selected NSAIDs at different concentrations (MIC, 5×MIC and 10×MIC).

| Biomass reduction (%)             | NSAIDs         |             |                  |             |
|-----------------------------------|----------------|-------------|------------------|-------------|
|                                   | <i>E. coli</i> |             | <i>S. aureus</i> |             |
|                                   | PXC            | ASA         | DCF              | ASA         |
| MIC                               | 28.6 ± 2.7     | -           | -                | -           |
| 5×MIC                             | 16.8 ± 0.1     | -           | -                | -           |
| 10×MIC                            | -              | -           | -                | -           |
| Biofilm inactivation (%)          | NSAIDs         |             |                  |             |
|                                   | <i>E. coli</i> |             | <i>S. aureus</i> |             |
|                                   | PXC            | ASA         | DCF              | ASA         |
| MIC                               | 73.2 ± 2.4     | 74.3 ± 3.8  | 80.4 ± 2.2       | 82.7 ± 2.4  |
| 5×MIC                             | 72.9 ± 2.2     | 74.1 ± 4.9  | 86.6 ± 3.2       | 84.0 ± 2.7  |
| 10×MIC                            | 66.1 ± 3.5     | 74.1 ± 4.4  | 86.7 ± 3.3       | 83.2 ± 3.8  |
| log CFU/cm <sup>2</sup> reduction | NSAIDs         |             |                  |             |
|                                   | <i>E. coli</i> |             | <i>S. aureus</i> |             |
|                                   | PXC            | ASA         | DCF              | ASA         |
| Negative control (DMSO)           | 0.68 ± 0.47    |             | 0.22 ± 0.40      |             |
| MIC                               | 3.24 ± 0.48    | 3.55 ± 0.47 | 2.22 ± 1.08      | 3.33 ± 0.32 |
| 5×MIC                             | 3.58 ± 0.47    | 6.46 ± 0.47 | 3.47 ± 0.67      | 6.19 ± 0.31 |
| 10×MIC                            | 3.78 ± 0.49    | 6.46 ± 0.47 | 6.19 ± 0.31      | 6.19 ± 0.31 |

Mean values ± Standard deviation are illustrated.

**Table S3.** Percentage of biomass reduction and cell inactivation and log CFU/cm<sup>2</sup> reduction of *E. coli* and *S. aureus* biofilms, grown in the presence of KAN and TET at MIC.

| Biomass reduction (%)             | Antibiotics    |             |                  |             |
|-----------------------------------|----------------|-------------|------------------|-------------|
|                                   | <i>E. coli</i> |             | <i>S. aureus</i> |             |
|                                   | KAN            | TET         | KAN              | TET         |
| MIC                               | 22.8 ± 1.8     | 21.5 ± 1.3  | 30.6 ± 1.0       | 31.2 ± 2.2  |
| Biofilm inactivation (%)          | Antibiotics    |             |                  |             |
|                                   | <i>E. coli</i> |             | <i>S. aureus</i> |             |
|                                   | KAN            | TET         | KAN              | TET         |
| MIC                               | 80.8 ± 2.2     | 66.8 ± 1.0  | 43.5 ± 2.8       | 26.8 ± 1.1  |
| log CFU/cm <sup>2</sup> reduction | Antibiotics    |             |                  |             |
|                                   | <i>E. coli</i> |             | <i>S. aureus</i> |             |
|                                   | KAN            | TET         | KAN              | TET         |
| MIC                               | 3.72 ± 0.37    | 2.21 ± 0.06 | 1.37 ± 0.33      | 0.85 ± 0.46 |

Mean values ± Standard deviation are illustrated.

**Table S4.** Percentage of biomass reduction and cell inactivation and log CFU/cm<sup>2</sup> reduction of *E. coli* and *S. aureus* biofilms, grown in the presence of the selected NSAIDs at different concentrations and antibiotics at MIC.

| Biomass reduction (%)             | NSAIDs + KAN   |             |                  |             | NSAIDs + TET   |             |                  |             |
|-----------------------------------|----------------|-------------|------------------|-------------|----------------|-------------|------------------|-------------|
|                                   | <i>E. coli</i> |             | <i>S. aureus</i> |             | <i>E. coli</i> |             | <i>S. aureus</i> |             |
|                                   | PXC            | ASA         | DCF              | ASA         | PXC            | ASA         | DCF              | ASA         |
| MIC                               | 17.8 ± 0.9     | 30.0 ± 1.1  | 12.2 ± 0.6       | 31.4 ± 1.3  | 12.4 ± 0.2     | 25.4 ± 0.1  | 16.2 ± 1.1       | 28.4 ± 1.5  |
| 5×MIC                             | 19.0 ± 1.1     | 30.0 ± 0.3  | 16.8 ± 2.0       | 28.1 ± 0.5  | 16.3 ± 0.7     | 20.1 ± 1.9  | 22.5 ± 0.4       | 27.4 ± 0.4  |
| 10×MIC                            | 25.2 ± 2.0     | 21.7 ± 0.8  | 23.5 ± 1.9       | 16.7 ± 2.0  | 20.5 ± 1.3     | 12.1 ± 1.6  | 32.4 ± 0.8       | 22.2 ± 0.4  |
| Biofilm inactivation (%)          | NSAIDs + KAN   |             |                  |             | NSAIDs + TET   |             |                  |             |
|                                   | <i>E. coli</i> |             | <i>S. aureus</i> |             | <i>E. coli</i> |             | <i>S. aureus</i> |             |
|                                   | PXC            | ASA         | DCF              | ASA         | PXC            | ASA         | DCF              | ASA         |
| MIC                               | 63.0 ± 0.5     | 86.3 ± 3.6  | 82.6 ± 0.5       | 73.3 ± 1.6  | 70.3 ± 0.5     | 88.8 ± 1.9  | 80.2 ± 6.7       | 74.4 ± 2.2  |
| 5×MIC                             | 67.2 ± 0.0     | 92.6 ± 1.1  | 89.3 ± 4.1       | 76.2 ± 2.6  | 74.0 ± 1.0     | 92.7 ± 1.1  | 89.2 ± 4.7       | 76.2 ± 1.6  |
| 10×MIC                            | 70.0 ± 1.4     | 92.5 ± 1.3  | 89.2 ± 3.7       | 77.2 ± 1.6  | 85.3 ± 0.8     | 92.7 ± 1.4  | 89.2 ± 4.7       | 76.7 ± 2.0  |
| log CFU/cm <sup>2</sup> reduction | NSAIDs + KAN   |             |                  |             | NSAIDs + TET   |             |                  |             |
|                                   | <i>E. coli</i> |             | <i>S. aureus</i> |             | <i>E. coli</i> |             | <i>S. aureus</i> |             |
|                                   | PXC            | ASA         | DCF              | ASA         | PXC            | ASA         | DCF              | ASA         |
| Negative control (DMSO)           | 0.68 ± 0.47    |             | 0.22 ± 0.40      |             | 0.68 ± 0.47    |             | 0.22 ± 0.40      |             |
| MIC                               | 2.48 ± 0.53    | 4.04 ± 0.68 | 3.00 ± 0.31      | 2.73 ± 0.70 | 1.76 ± 0.47    | 1.35 ± 0.84 | 0.99 ± 0.33      | 1.04 ± 0.31 |
| 5×MIC                             | 2.57 ± 0.55    | 6.46 ± 0.47 | 3.15 ± 0.32      | 6.19 ± 0.31 | 1.96 ± 0.47    | 3.86 ± 0.49 | 3.05 ± 0.33      | 2.06 ± 0.31 |
| 10×MIC                            | 2.64 ± 0.56    | 6.46 ± 0.47 | 6.19 ± 0.31      | 6.19 ± 0.31 | 2.24 ± 0.47    | 6.46 ± 0.47 | 6.19 ± 0.31      | 6.19 ± 0.31 |

Mean values ± Standard deviation are illustrated.

**Table S5.** Classification of the efficacy of the selected NSAIDs (at MIC, 5×MIC and 10×MIC) and KAN and TET (at MIC), in the control of *E. coli* and *S. aureus* biofilms, in terms of biomass reduction and biofilm inactivation.

| Bacteria       | Antibiotic | MIC           | Biomass reduction | Biofilm inactivation |
|----------------|------------|---------------|-------------------|----------------------|
| <i>E. coli</i> | KAN        | MIC           | Low efficacy      | High efficacy        |
|                | TET        | MIC           | Low efficacy      | High efficacy        |
|                | PXC        | MIC           | Moderate efficacy | High efficacy        |
|                |            | 5× MIC        | Low efficacy      | High efficacy        |
|                |            | 10× MIC       | Low efficacy      | High efficacy        |
|                |            | MIC + MIC     | Low efficacy      | High efficacy        |
|                | PXC+KAN    | 5× MIC + MIC  | Low efficacy      | High efficacy        |
|                |            | 10× MIC + MIC | Moderate efficacy | High efficacy        |
|                | PXC+TET    | MIC + MIC     | Low efficacy      | High efficacy        |
|                |            | 5×MIC + MIC   | Low efficacy      | High efficacy        |

|                  |         |              |                   |                    |
|------------------|---------|--------------|-------------------|--------------------|
| <i>S. aureus</i> | ASA     | 10×MIC + MIC | Low efficacy      | High efficacy      |
|                  |         | MIC          | Low efficacy      | High efficacy      |
|                  |         | 5×MIC        | Low efficacy      | High efficacy      |
|                  |         | 10×MIC       | Low efficacy      | High efficacy      |
|                  |         | MIC + MIC    | Moderate efficacy | High efficacy      |
|                  |         | 5×MIC + MIC  | Moderate efficacy | Excellent efficacy |
|                  |         | 10×MIC + MIC | Low efficacy      | Excellent efficacy |
|                  |         | MIC + MIC    | Moderate efficacy | High efficacy      |
|                  |         | 5×MIC + MIC  | Low efficacy      | Excellent efficacy |
|                  |         | 10×MIC + MIC | Low efficacy      | Excellent efficacy |
|                  | KAN     | MIC          | Moderate efficacy | Moderate efficacy  |
|                  |         | MIC          | Moderate efficacy | Moderate efficacy  |
|                  | DCF     | MIC          | Low efficacy      | High efficacy      |
|                  |         | 5×MIC        | Low efficacy      | High efficacy      |
|                  |         | 10×MIC       | Low efficacy      | High efficacy      |
|                  | DCF+KAN | MIC + MIC    | Low efficacy      | High efficacy      |
|                  |         | 5×MIC + MIC  | Low efficacy      | High efficacy      |
|                  |         | 10×MIC + MIC | Low efficacy      | High efficacy      |
|                  | DCF+TET | MIC + MIC    | Low efficacy      | High efficacy      |
|                  |         | 5×MIC + MIC  | Low efficacy      | High efficacy      |
|                  |         | 10×MIC + MIC | Moderate efficacy | High efficacy      |
|                  | ASA     | MIC          | Low efficacy      | High efficacy      |
|                  |         | 5×MIC        | Low efficacy      | High efficacy      |
|                  |         | 10×MIC       | Low efficacy      | High efficacy      |
|                  | ASA+KAN | MIC + MIC    | Moderate efficacy | High efficacy      |
|                  |         | 5×MIC + MIC  | Moderate efficacy | High efficacy      |
|                  |         | 10×MIC + MIC | Low efficacy      | High efficacy      |
|                  | ASA+TET | MIC + MIC    | Moderate efficacy | High efficacy      |
|                  |         | 5×MIC + MIC  | Moderate efficacy | High efficacy      |
|                  |         | 10×MIC + MIC | Low efficacy      | High efficacy      |
